# Supplementary material for: Mediating role of homebound status between depressive symptoms and cognitive impairment among community-dwelling older adults in the USA: a cross-sectional analysis of a cohort study
Source: HighWire-hosted journal article supplement (doi:10.1136/bmjopen-2022-065536), 2022-10-01
Supplement: bmjopen-2022-065536supp001_data_supplement.pdf [file bmjopen-2022-065536supp001_data_supplement.pdf]

### Supplement

Supplementary table 1. Characteristics distribution stratified by self-reported cognitive status, M  $\pm$  SD, N (%)

Supplementary table 2. Results of logistic regression analysis of associations among depressive symptoms, homebound and cognitive impairment excluding proxy respondents (N=6,746-6,978)

Supplementary table 3. Mediation of homebound status in the association between depressive symptoms and cognitive impairment excluding proxy respondents (N=6,746-6,978)

**Supplementary table 1. Characteristics distribution stratified by self-reported cognitive status**

| Characteristics                     | Total<br>(N=6,746-<br>6,978) | Cognitive<br>impairment<br>(n=1,416-1,530) | Nocognitive<br>impairment<br>(n=5,330-5,448) | <i>P</i> values |
|-------------------------------------|------------------------------|--------------------------------------------|----------------------------------------------|-----------------|
| Age, M ± SD                         | 77.2 ± 7.7                   | 81.2 ± 7.7                                 | 76.1 ± 7.3                                   | <.001           |
| Sex, n (%)                          |                              |                                            |                                              | .800            |
| Female                              | 4051 (58.1)                  | 858 (56.1)                                 | 3193 (58.6)                                  |                 |
| Male                                | 2927 (41.9)                  | 672 (43.9)                                 | 2255 (41.4)                                  |                 |
| Race/ethnicity, n (%)               |                              |                                            |                                              | <.001           |
| White, non-Hispanic                 | 4847 (69.5)                  | 878 (57.4)                                 | 3969 (72.9)                                  |                 |
| Black, non-Hispanic                 | 1483 (21.2)                  | 421 (27.5)                                 | 1062 (19.5)                                  |                 |
| Hispanic                            | 253 (3.6)                    | 84 (5.5)                                   | 169 (3.1)                                    |                 |
| Other                               | 395 (5.7)                    | 147 (9.6)                                  | 248 (4.5)                                    |                 |
| Education, n (%)                    |                              |                                            |                                              | <.001           |
| Less than high school               | 1760 (25.5)                  | 686 (45.6)                                 | 1074 (19.9)                                  |                 |
| High school                         | 1905 (27.6)                  | 370 (24.6)                                 | 1535 (28.4)                                  |                 |
| Some college or vocational school   | 1734 (25.1)                  | 255 (17.0)                                 | 1479 (27.4)                                  |                 |
| College or higher                   | 1509 (21.8)                  | 191 (12.7)                                 | 1318 (24.3)                                  |                 |
| Living arrangement, n (%)           |                              |                                            |                                              | <.001           |
| Alone                               | 2315 (33.3)                  | 575 (37.8)                                 | 1740 (32.1)                                  |                 |
| With spouse/partner only            | 2913 (41.9)                  | 447 (29.3)                                 | 2466 (45.5)                                  |                 |
| With others only                    | 1104 (15.9)                  | 359 (23.6)                                 | 745 (13.7)                                   |                 |
| With spouse/partner and with others | 615 (8.9)                    | 142 (9.3)                                  | 473 (8.7)                                    |                 |
| Smoking status, n (%)               |                              |                                            |                                              | <.001           |
| No                                  | 3382 (48.5)                  | 789 (51.7)                                 | 2593 (47.6)                                  |                 |
| Yes                                 | 3591 (51.5)                  | 738 (48.3)                                 | 2853 (52.4)                                  |                 |
| Vigorous activity, n (%)            |                              |                                            |                                              | <.001           |
| No                                  | 4470 (64.1)                  | 1235 (80.8)                                | 3235 (59.4)                                  |                 |
| Yes                                 | 2507 (35.9)                  | 294 (19.2)                                 | 2213 (40.6)                                  |                 |
| BMI, n (%)                          |                              |                                            |                                              | <.001           |
| Normal (<30 kg/m <sup>2</sup> )     | 4881 (72.3)                  | 1115 (78.7)                                | 3766 (70.7)                                  |                 |
| Obesity (≥30 kg/m <sup>2</sup> )    | 1865 (27.7)                  | 301 (21.3)                                 | 1564 (29.3)                                  |                 |
| Visual impairment, n (%)            |                              |                                            |                                              | <.001           |
| No                                  | 6347 (91.2)                  | 1281(83.9)                                 | 5066 (93.2)                                  |                 |
| Yes                                 | 615 (8.8)                    | 246 (16.1)                                 | 369 (6.8)                                    |                 |
| Auditory impairment, n (%)          |                              |                                            |                                              | <.001           |
| No                                  | 5381 (77.1)                  | 1079 (70.5)                                | 4302 (79.0)                                  |                 |
| Yes                                 | 1597 (22.9)                  | 451 (29.5)                                 | 1146 (21.0)                                  |                 |
| Hypertension, n (%)                 |                              |                                            |                                              | .905            |
| No                                  | 2306 (33.1)                  | 503 (33.0)                                 | 1803 (33.1)                                  |                 |
| Yes                                 | 4663 (66.9)                  | 1023 (67.0)                                | 3640 (66.9)                                  |                 |

|                                   |             |             |             |       |
|-----------------------------------|-------------|-------------|-------------|-------|
| Diabetes, n (%)                   |             |             |             | <.001 |
| No                                | 5218 (74.8) | 1074 (70.3) | 4144 (76.1) |       |
| Yes                               | 1757 (25.2) | 453 (29.7)  | 1304 (23.9) |       |
| Stroke, n (%)                     |             |             |             | <.001 |
| No                                | 6246 (89.6) | 1289 (84.4) | 4957 (91.1) |       |
| Yes                               | 726 (10.4)  | 239 (15.6)  | 487 (8.9)   |       |
| Number of ADL impairments, M ± SD | 1.2 ± 0.7   | 1.5 ± 1.0   | 1.2 ± 0.6   | <.001 |
| Hospitalization, n (%)            |             |             |             | <.001 |
| No                                | 5428 (77.9) | 1071 (71.2) | 4357 (80.0) |       |
| Yes                               | 1542 (22.1) | 455 (29.8)  | 1087 (20.0) |       |
| Depressive symptoms, n (%)        |             |             |             | <.001 |
| No                                | 5974 (85.6) | 1177 (76.9) | 4797 (88.1) |       |
| Yes                               | 1004 (14.4) | 353 (23.1)  | 651 (11.9)  |       |
| Homebound, n (%)                  |             |             |             | <.001 |
| No                                | 5509 (79.0) | 937 (61.2)  | 4572 (83.9) |       |
| Yes                               | 1469 (21.0) | 593 (38.8)  | 876 (16.1)  |       |

Abbreviations: M, mean; SD, standard deviations; BMI, body mass index; ADL, activity of daily living.

**Supplementary table 2. Results of logistic regression analysis of associations among depressive symptoms, homebound and cognitive impairment excluding proxy respondents (N=6,746-6,978)**

| Independent variable(s) | Effect size for association, OR (95% CI) <sup>b</sup> |                           |                               |                               |
|-------------------------|-------------------------------------------------------|---------------------------|-------------------------------|-------------------------------|
|                         | Dependent Variable                                    |                           |                               |                               |
|                         | Model 1: Cognitive Impairment                         | Model 2: Homebound Status | Model 3: Cognitive Impairment | Model 4: Cognitive Impairment |
| Depressive symptoms     | 1.52 (1.27-1.81) ***                                  | 1.92 (1.59-2.33) ***      | NA                            | 1.47 (1.23-1.75) ***          |
| Homebound status        | NA                                                    | NA                        | 1.51 (1.27-1.80) ***          | 1.46 (1.23-1.75) ***          |

Abbreviations: OR, odds ratio; NA, not applicable.

a \* P <.05, \*\* P <.01, \*\*\*P<.001

b All models adjusted for demographics (age, sex, education, race/ethnicity, living arrangement) and health-related characteristics (smoke, body mass index, vigorous activity, visual impairment, auditory impairment, hypertension, diabetes, stroke, number of activities of daily living impairments, hospitalization).

**Supplementary table 3. Mediation of homebound status in the association between depressive symptoms and cognitive impairment excluding proxy respondents (N=6,746-6,978)**

|                                  | Model 1 <sup>b</sup> | Model 2 <sup>c</sup> | Model 3 <sup>d</sup> |
|----------------------------------|----------------------|----------------------|----------------------|
|                                  | OR (95% CI)          | OR (95% CI)          | OR (95% CI)          |
| Natural direct effect            | 1.71 (1.46-1.98) *** | 1.63 (1.39-1.93) *** | 1.47 (1.24-1.78) *** |
| Natural indirect effect          | 1.36 (1.29-1.43) *** | 1.19 (1.14-1.24) *** | 1.05 (1.02-1.08) *** |
| Marginal total effect            | 2.33 (2.00-2.71) *** | 1.95 (1.66-2.30) *** | 1.54 (1.30-1.86) *** |
| Proportion mediated <sup>a</sup> | 57.3%                | 36.5%                | 12.7%                |

<sup>a</sup> Proportion mediated by homebound status were calculated as the log of the indirect effect divided by the log of the total effect.

<sup>b</sup> Model 1: independent variables of interest

<sup>c</sup> Model 2: Model 1+ demographic covariates (age, sex, education, race/ethnicity, living arrangement)

<sup>d</sup> Model 3: Model 2 + health-related covariates (smoke, body mass index, vigorous activity, visual impairment, auditory impairment, hypertension, diabetes, stroke, number of activities of daily life impairment, hospitalization)
